# Supplementary material
Source: Springer Nature journal article supplement (https://www.springermedizin.de/resource/supplementary/13012_2006_100_MOESM1_ESM.pdf/9629242)

Describe socio-ecological features of problem

Identify intervention options

- *Integrating theory (1)*

Optimize potential impact of interventions

- *Creating synergy (2, 3)*
- *Achieving adequate implementation (4, 5)*
- *Creating enabling structures and conditions (6)*

Monitor process, impact, spin-offs and sustainability

- *Modifying interventions during implementation (7, 8)*
- *Facilitating sustainability (9)*

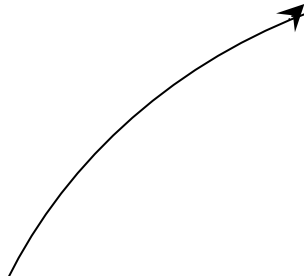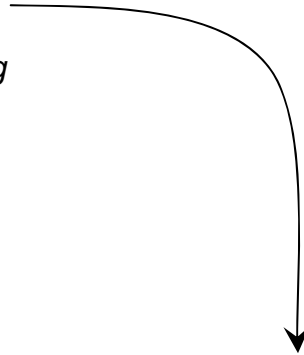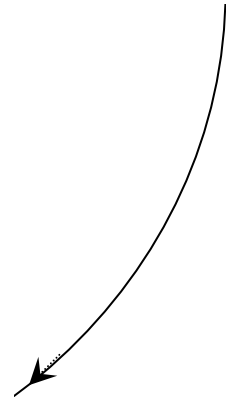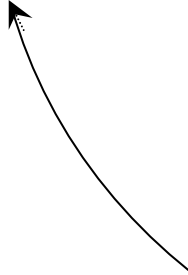

Supplement: MOESM1 [file 9629242]
